# Supplementary material for: A new synthesis of porphyrins via a putative trans-manganese(iv)-dihydroxide intermediate
Source: Royal Society of Chemistry journal article supplement (doi:10.1039/c9dt03573g), 2019-12-23
Supplement: c9dt03573g1.pdf [file c9dt03573g1.pdf]

## Electronic Supplementary Information (ESI)

### **A new synthesis of porphyrin via a putative *trans*-manganese(IV)-dihydroxide intermediate**

**Sruti Mondal, Kasturi Sahu, Bratati Patra, Subhrakant Jena, Himansu S. Biswal,\*and Sanjib Kar\***

School of Chemical Sciences, National Institute of Science Education and Research (NISER), Bhubaneswar, Khordha, 752050, India and Homi Bhabha National Institute, Training School Complex, Anushakti Nagar, Mumbai, 400 094, India

E-mail: [himansu@niser.ac.in](mailto:himansu@niser.ac.in), [sanjib@niser.ac.in](mailto:sanjib@niser.ac.in)

## Experimental section

### Synthesis of 5,15-bis(4-cyanophenyl)-10-(pentafluorophenyl)tetrapyrane

The following synthesis was performed by following a protocol reported earlier.<sup>1</sup> 0.100 g (0.4 mmol) of 5-(4-cyanophenyl)dipyrromethane and 49.3  $\mu\text{L}$  (0.4 mmol) of 2,3,4,5,6-Pentafluorobenzaldehyde were dissolved in 50 mL MeOH and 25 mL water (2:1) mixture. Subsequently, 5 mL of aqueous HCl (36%) was added to it. The reaction mixture was kept on stirring for 2 hours at room temperature. The crude product was washed and extracted several times with chloroform and water and dried over anhydrous  $\text{Na}_2\text{SO}_4$ . The solvent was evaporated to dryness. The reaction mixture was purged through a silica gel (100-200 mesh) column. The final product was eluted using EtOAc/hexane mixture as eluent.

### For 5,15-bis(4-cyanophenyl)-10-(pentafluorophenyl)tetrapyrane

Yield: 30% (41 mg). Anal. Calcd (found) for  $\text{C}_{39}\text{H}_{25}\text{F}_5\text{N}_6$ : C, 69.64 (69.77); H, 3.75 (3.84); N, 12.49 (12.37).  $^1\text{H}$  NMR (400 MHz, Chloroform-*d*)  $\delta$  8.14 – 7.86 (br s, 4H), 7.53 (m, 5H), 6.79 – 6.60 (m, 2H), 6.15 (dt,  $J = 11.2, 3.0$  Hz, 2H), 5.97 – 5.53 (m, 9H), 5.42 (d,  $J = 6.3$  Hz, 2H), 5.31 (s, 1H) (Fig. S13); The electrospray mass spectrum in acetonitrile showed peaks centred at  $m/z = 695.1893$  correspond to  $[\text{M}+\text{Na}^+]$  (695.196 calcd for  $\text{C}_{39}\text{H}_{25}\text{F}_5\text{N}_6\text{Na}$ ) (Fig. S14).

1. B. Koszarna and D. T. Gryko, *J. Org. Chem.* 2006, **71**, 3707-3717.

- Table S1** UV–Vis. Data <sup>a</sup>
- Table S2** Composition of selected molecular orbitals of **7-Mn**.
- Table S3** Composition of selected molecular orbitals of **7-Mn**.
- Table S4** TD-DFT transitions for **7-Mn**.
- Table S5** TD-DFT calculated IR frequencies for **7-Mn**.
- Fig. S1** ESI- MS spectrum in CH<sub>3</sub>CN shows the (a) measured spectrum, (b) isotopic distribution pattern (experimental) and (c) isotopic distribution pattern (simulated) of **7-Mn**.
- Fig. S2** Cyclic voltammogram (—) of **7-Mn** in CH<sub>3</sub>CN. The potentials are vs. ferrocene/ferricinium.
- Fig. S3** <sup>1</sup>H NMR spectrum of 5,15-Bis(pentafluorophenyl)-10,20-diphenylporphyrin, **1** in CDCl<sub>3</sub>.
- Fig. S4** <sup>1</sup>H NMR spectrum of 5,15-Bis(4-cyanophenyl)-10,20-bis(4-methoxyphenyl)porphyrin, **2** in CDCl<sub>3</sub>.
- Fig. S5** <sup>1</sup>H NMR spectrum of 5,15-Dimesityl-10,20-diphenylporphyrin, **3** in CDCl<sub>3</sub>.
- Fig. S6** <sup>1</sup>H NMR spectrum of 5,15-Bis(4-methoxyphenyl)-10,20-diphenylporphyrin, **4** in CDCl<sub>3</sub>.
- Fig. S7** <sup>1</sup>H NMR spectrum of 5,15-Bis(4-cyanophenyl)-10,20-diphenylporphyrin, **5** in CDCl<sub>3</sub>.
- Fig. S8** <sup>1</sup>H NMR spectrum of 5,15-Bis(4-methoxyphenyl)-10,20-bis(pentafluorophenyl)porphyrin, **6** in CDCl<sub>3</sub>.
- Fig. S9** <sup>1</sup>H NMR spectrum of 5,15-bis(4-cyanophenyl)-10,20-bis(pentafluorophenyl)porphyrin, **7** in CDCl<sub>3</sub>.
- Fig. S10** <sup>1</sup>H NMR spectrum of 5,10,15,20-Tetraphenylporphyrin, **8** in CDCl<sub>3</sub>.
- Fig. S11** <sup>1</sup>H NMR spectrum of 5,10,15,20-Tetrakis(4-methoxyphenyl)porphyrin, **9** in CDCl<sub>3</sub>.
- Fig. S12** Chemical reduction of **7-Mn** via LiAlH<sub>4</sub> in DCM solution at RT. Black line indicates the absorption spectra before reduction and red line indicates the species obtained after reduction.

**Fig. S13**  $^1\text{H}$  NMR spectrum of 5,15-bis(4-cyanophenyl)-10-(pentafluorophenyl)tetrapyrane in  $\text{CDCl}_3$ .

**Fig. S14** ESI- MS spectrum in  $\text{CH}_3\text{CN}$  shows the (a) measured spectrum, (b) isotopic distribution pattern of 5,15-bis(4-cyanophenyl)-10-(pentafluorophenyl)tetrapyrane.

**Table S1** UV-Vis. Data <sup>a</sup>

| Compound                 | UV-vis. Data <sup>a</sup><br>$\lambda_{\text{max}} / \text{nm} (\epsilon / \text{M}^{-1}\text{cm}^{-1})$ |
|--------------------------|----------------------------------------------------------------------------------------------------------|
| <b>7-Mn</b> <sup>a</sup> | 416 (10,860), 470 (7970), 576 (4020), 621 (7140).                                                        |

<sup>a</sup> In dichloromethane.

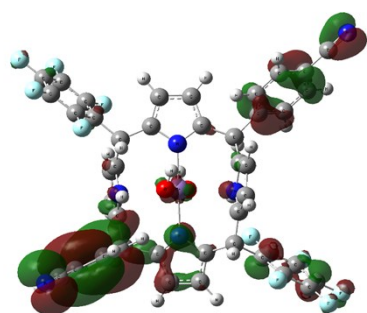

SOMO-11(227A)

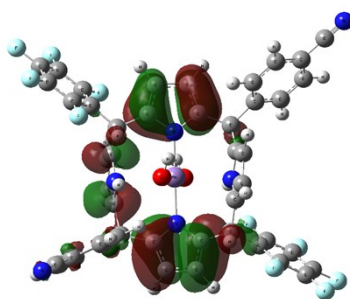

LUMO(239A)

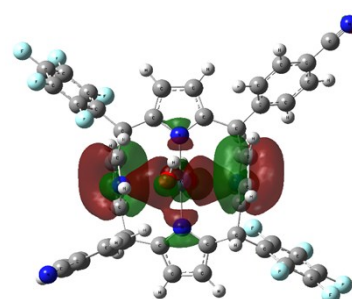

SOMO-18(220A)

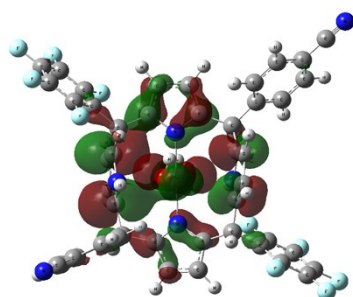

SOMO-3(235A)

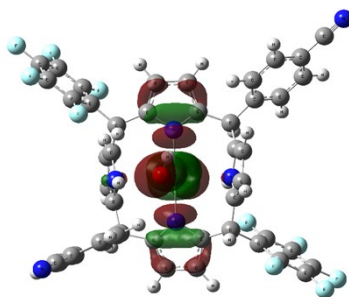

LUMO+1(240A)

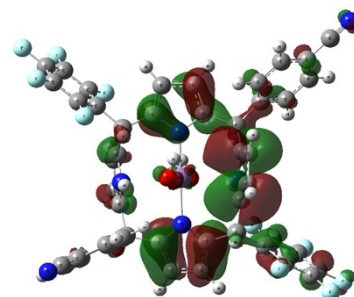

SOMO-2(233B)

**Table S2** Composition of selected molecular orbitals of **7-Mn**.

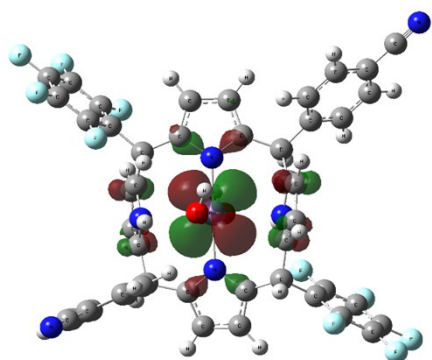

LUMO(236B)

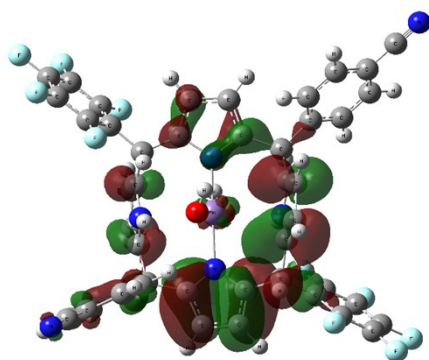

SOMO-1(234B)

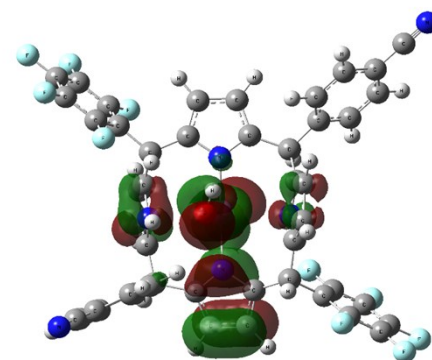

SOMO-6(232A)

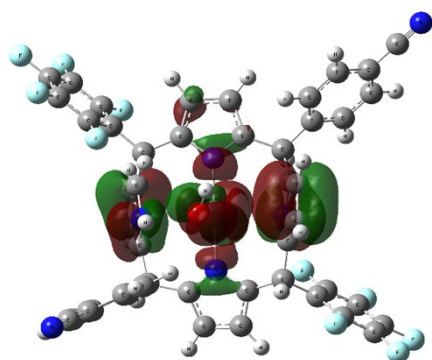

SOMO-4(234A)

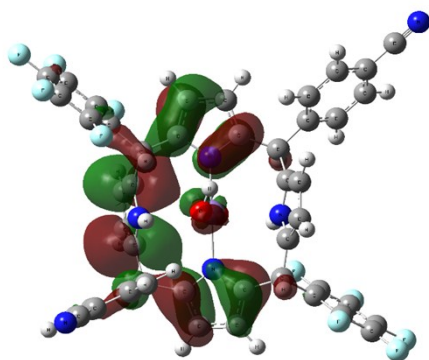

SOMO-3(232B)

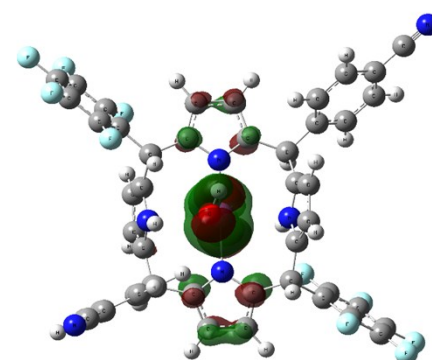

LUMO+1(237B)

**Table S3** Composition of selected molecular orbitals of **7-Mn**.

| State           | E(eV) | Transition Orbitals          | Contribution | Character |
|-----------------|-------|------------------------------|--------------|-----------|
| S <sub>13</sub> | 1.76  | SOMO-11(227A) to LUMO(239A)  | 0.99(100%)   | ILCT      |
| S <sub>26</sub> | 2.31  | SOMO-18(220A) to LUMO(239A)  | 0.11(1.19%)  | LMCT      |
|                 |       | SOMO-3(235A) to LUMO+1(240A) | 0.11(1.30%)  | LMCT      |
|                 |       | SOMO-2(233B) to LUMO(236B)   | 0.98(96.30%) | LMCT      |
|                 |       | SOMO-1(234B) to LUMO(236B)   | 0.11(1.20%)  | LMCT      |
| S <sub>29</sub> | 2.52  | SOMO-6(232A) to LUMO+1(240A) | 0.22(4.87%)  | LMCT      |
|                 |       | SOMO-4(234A) to LUMO+1(240A) | 0.66(44.37%) | LMCT      |
|                 |       | SOMO-3(232B) to LUMO(236B)   | 0.69(48.37%) | LMCT      |
|                 |       | SOMO-1(234B) to LUMO+1(237B) | 0.14(1.92%)  | LMCT      |

**Table S4** TD-DFT transitions for **7-Mn**.



**Table S5** TD-DFT calculated IR frequencies for **7-Mn**.

| <b>Functional Group</b>      | <b>IR Frequency(cm<sup>-1</sup>)</b> |
|------------------------------|--------------------------------------|
| <b>Water Stretch</b>         | 3667.10                              |
|                              | 3664.82                              |
| <b>Pyrrole NH</b>            | 3466.32                              |
|                              | 3437.08                              |
| <b>Pyrrole CH</b>            | 3235.57 -3176.80                     |
| <b>Benzonitrile CH</b>       | 3153.95-3119.51                      |
| <b>PFB</b>                   | 2993-2924                            |
| <b>CN Stretch</b>            | 2257.96                              |
|                              | 2257.83                              |
| <b>Aromatics C=C bending</b> | 1627.74-900                          |
| <b>OH bending</b>            | 700-900                              |

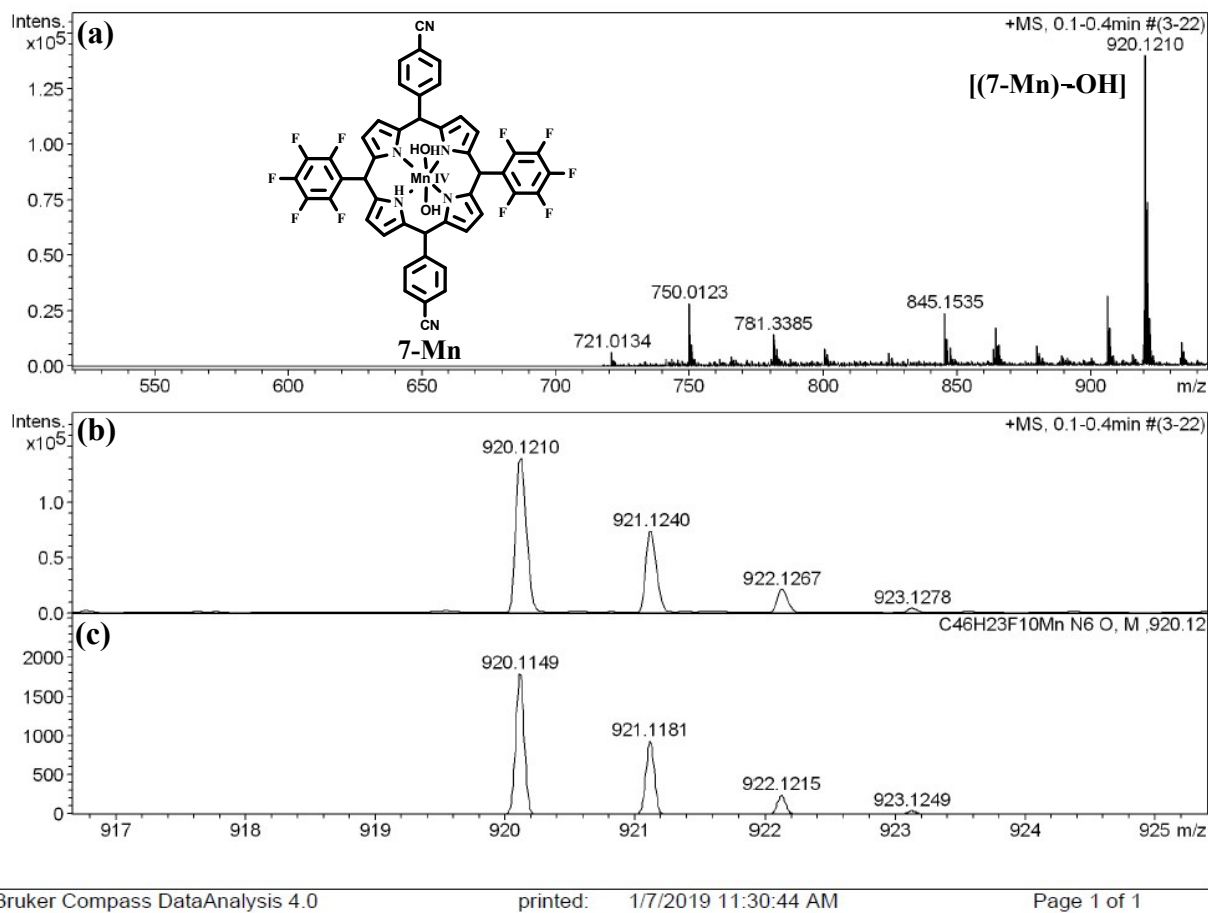

**Fig. S1** ESI- MS spectrum in  $CH_3CN$  shows the (a) measured spectrum, (b) isotopic distribution pattern (experimental) and (c) isotopic distribution pattern (simulated) of **7-Mn**.

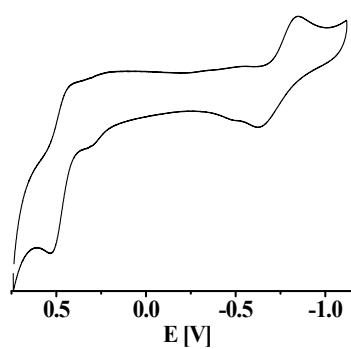

**Fig. S2** Cyclic voltammogram (—) of **7-Mn** in CH<sub>3</sub>CN. The potentials are vs. ferrocene/ferricinium.

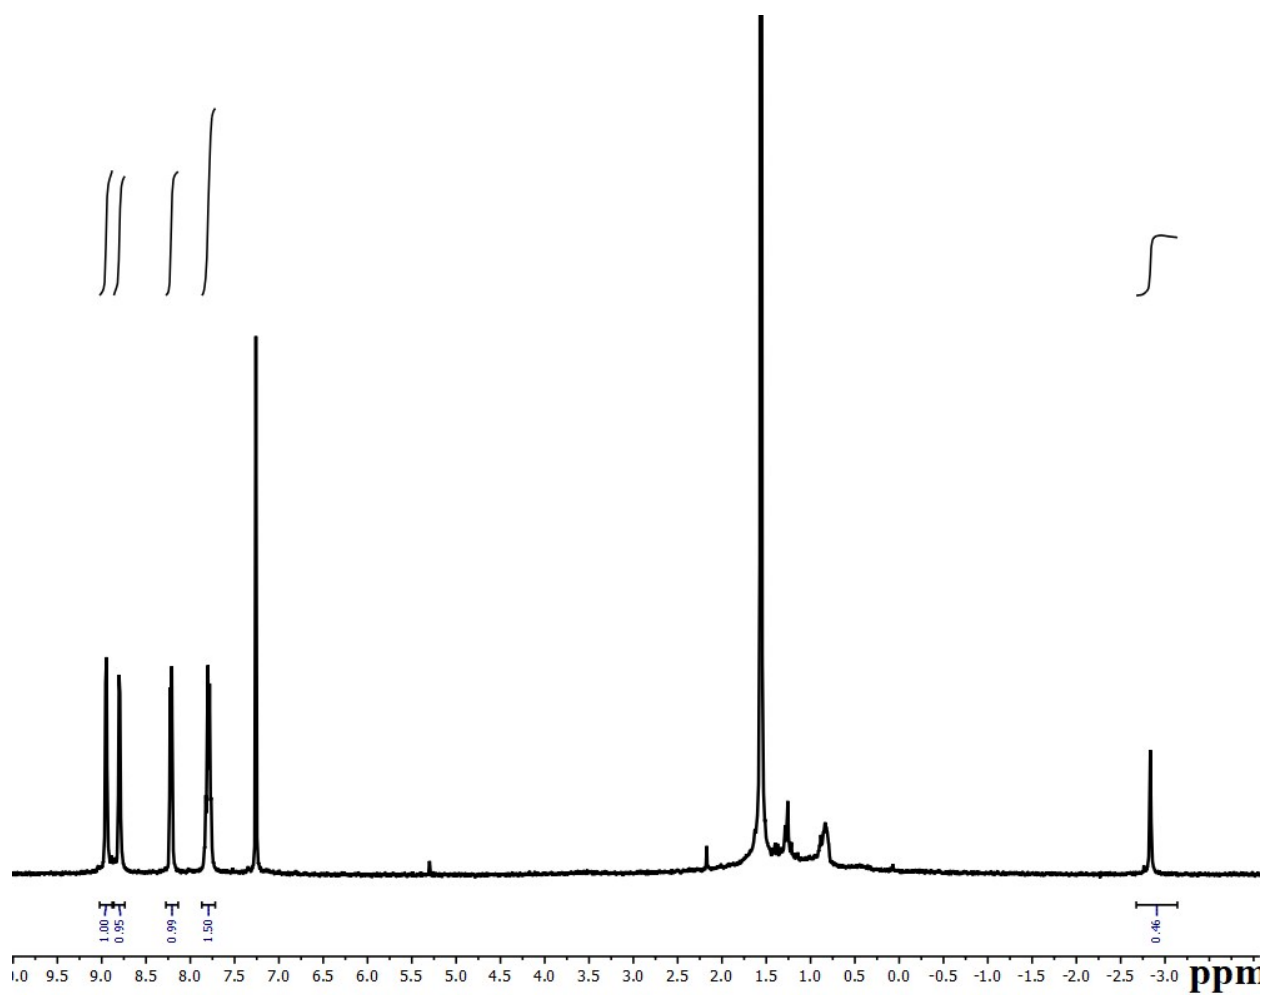

**Fig. S3**  $^1\text{H}$  NMR spectrum of 5,15-bis(pentafluorophenyl)-10,20-diphenylporphyrin, **1** in  $\text{CDCl}_3$ .

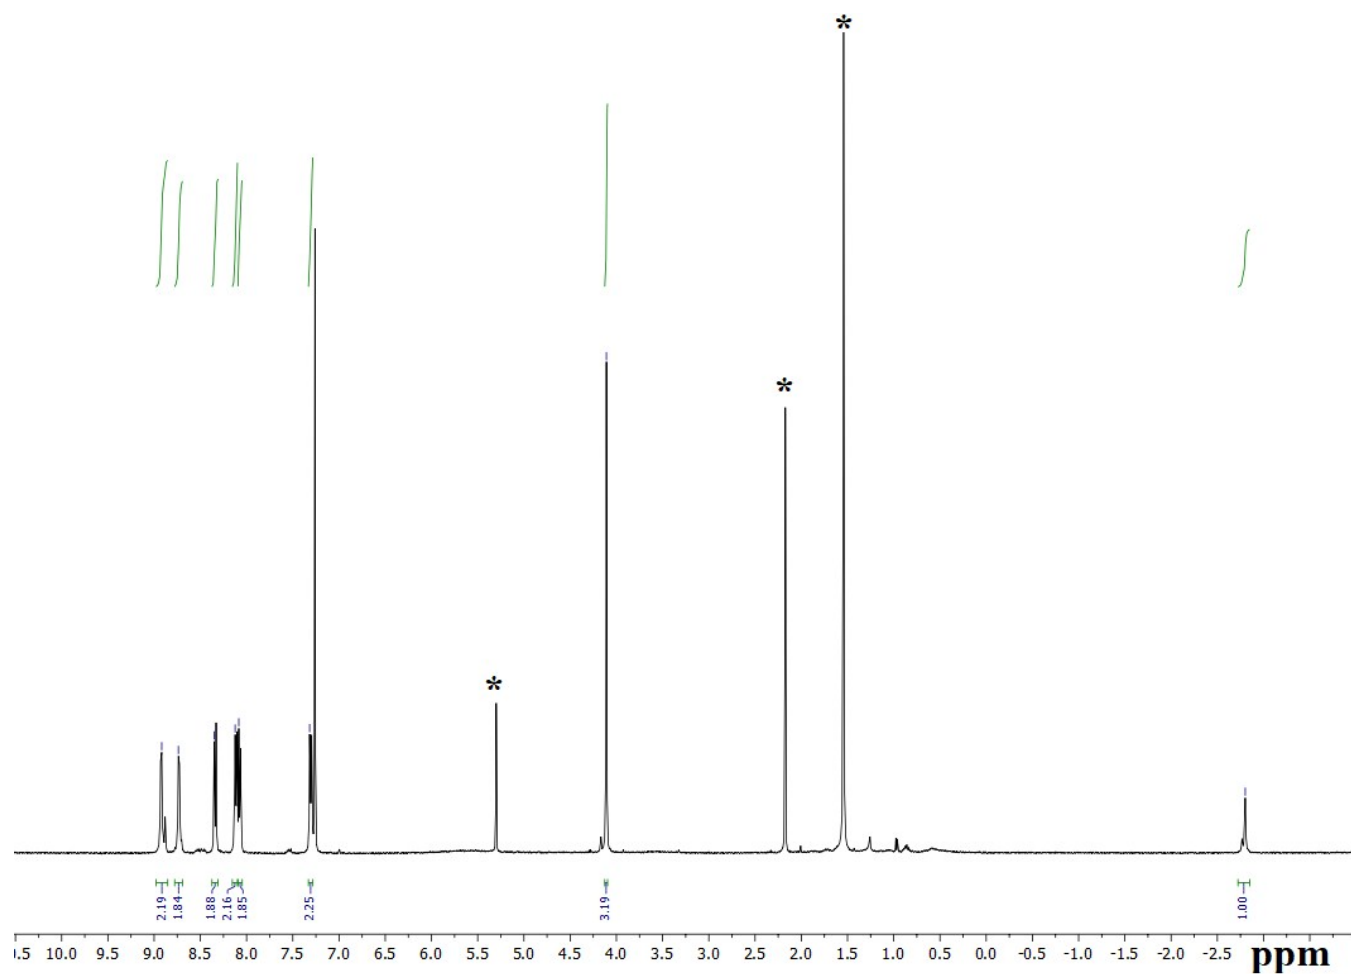

**Fig. S4**  $^1\text{H}$  NMR spectrum of 5,15-Bis(4-cyanophenyl)-10,20-bis(4-methoxyphenyl)porphyrin, **2** in  $\text{CDCl}_3$ .

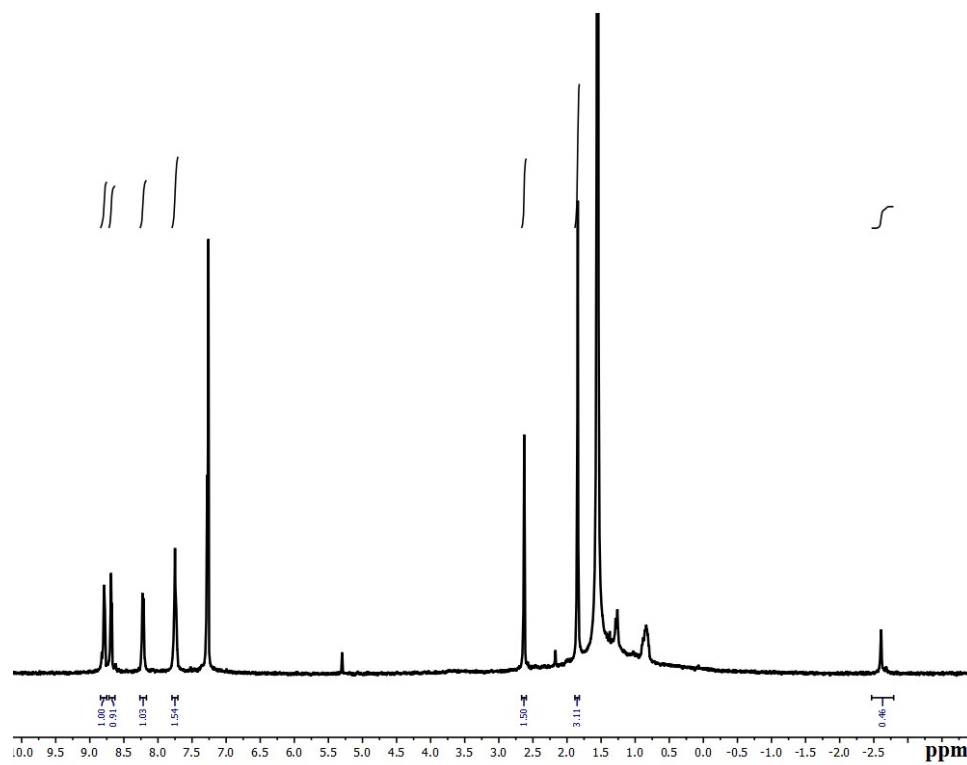

**Fig. S5**  $^1\text{H}$  NMR spectrum of 5,15-Dimesityl-10,20-diphenylporphyrin, **3** in  $\text{CDCl}_3$ .

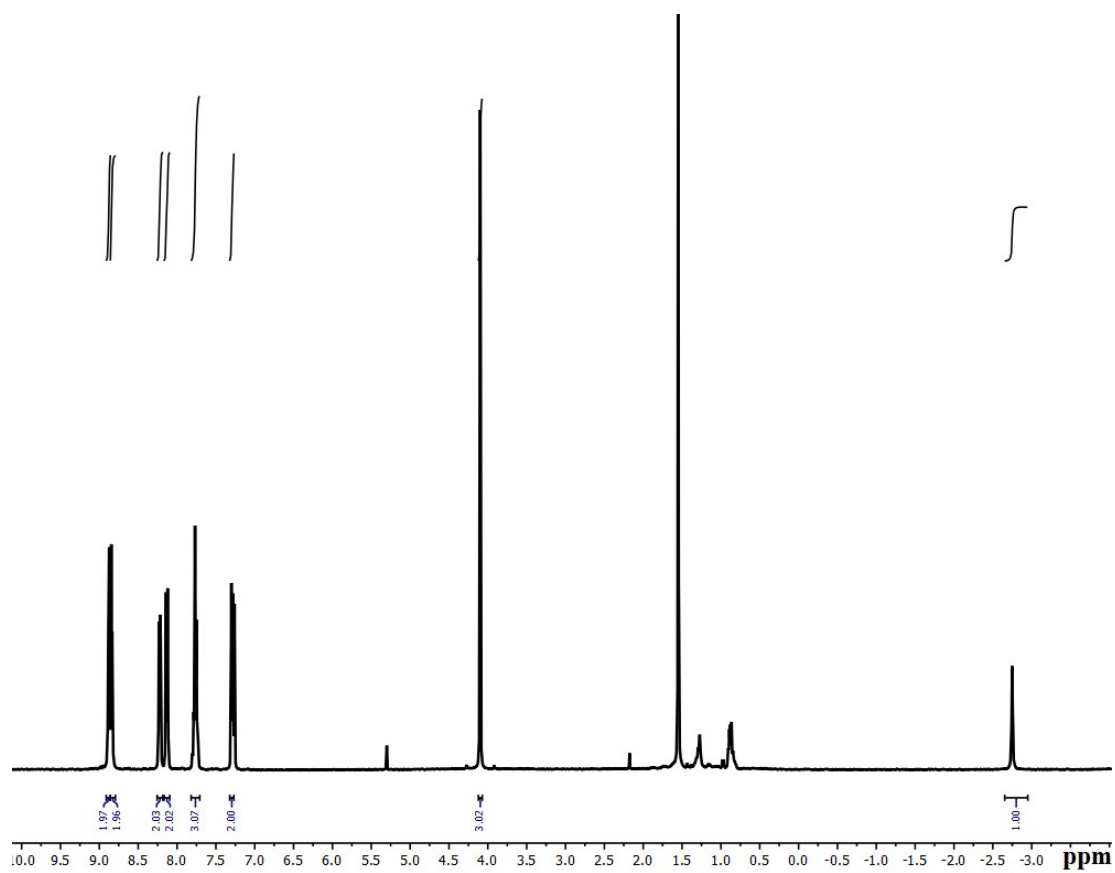

**Fig. S6**  $^1\text{H}$  NMR spectrum of 5,15-Bis(4-methoxyphenyl)-10,20-diphenylporphyrin, 4 in  $\text{CDCl}_3$ .

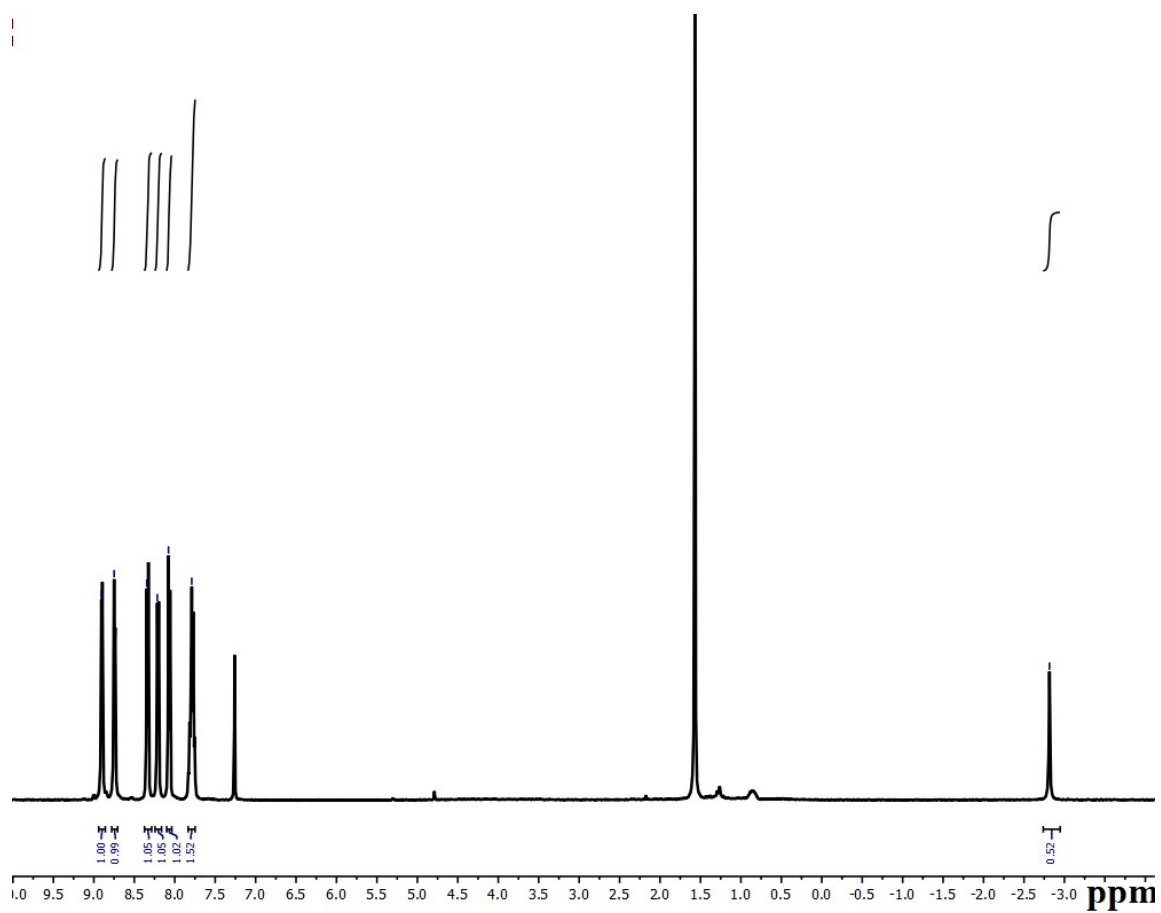

**Fig. S7**  $^1\text{H}$  NMR spectrum of 5,15-Bis(4-cyanophenyl)-10,20-diphenylporphyrin, **5** in  $\text{CDCl}_3$ .



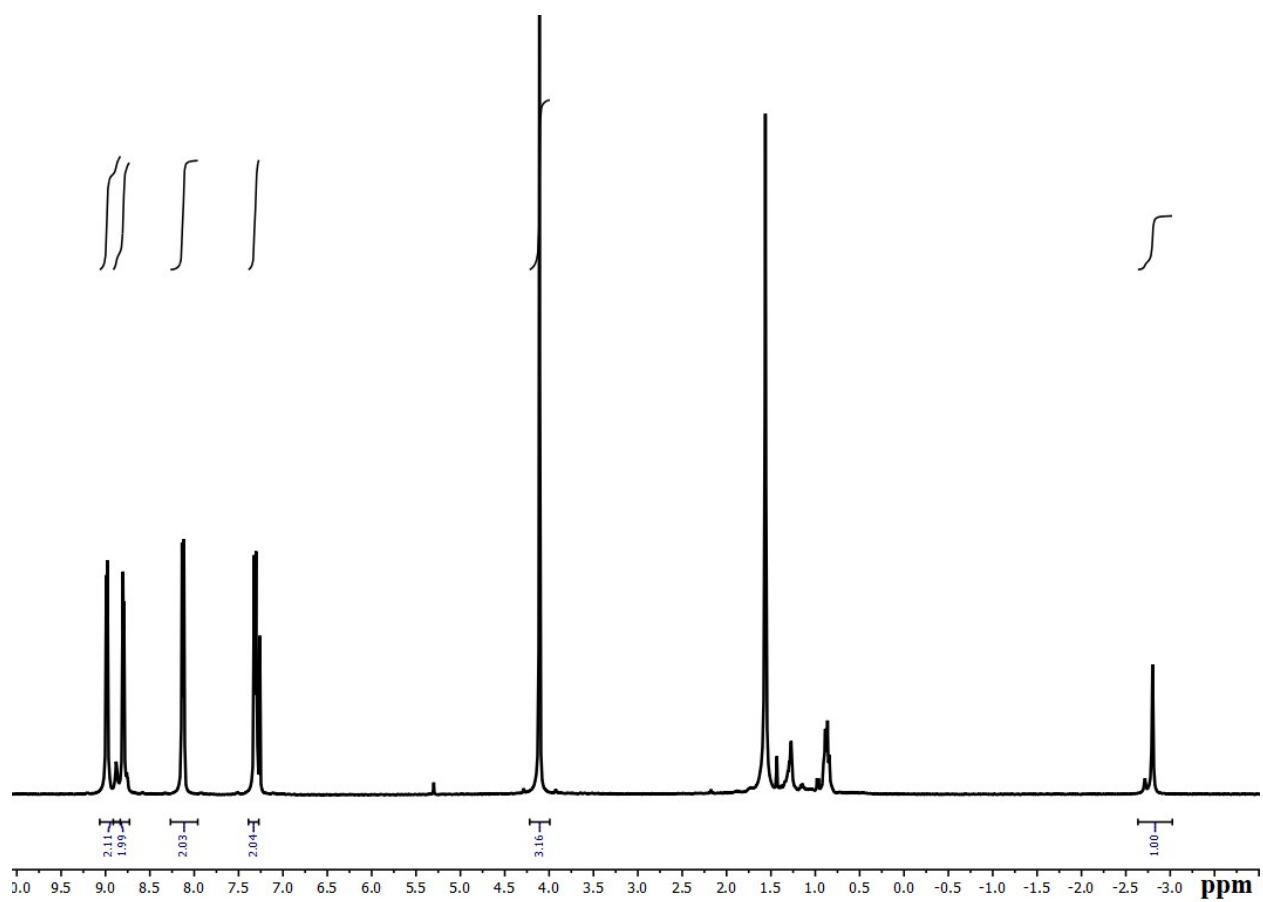

**Fig. S8**  $^1\text{H}$  NMR spectrum of 5,15-Bis(4-methoxyphenyl)-10,20-bis(pentafluorophenyl)porphyrin, **6** in  $\text{CDCl}_3$ .

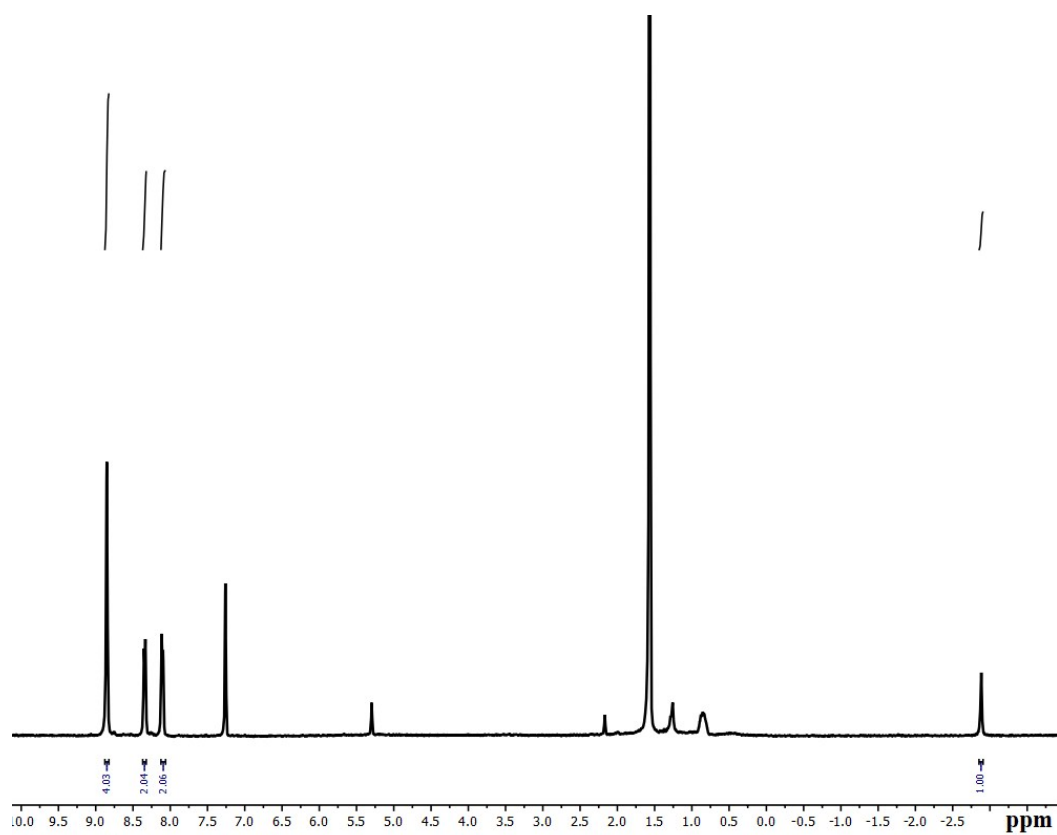

**Fig. S9**  $^1\text{H}$  NMR spectrum of 5,15-bis(4-cyanophenyl)-10,20-bis(pentafluorophenyl)porphyrin, **7** in  $\text{CDCl}_3$ .

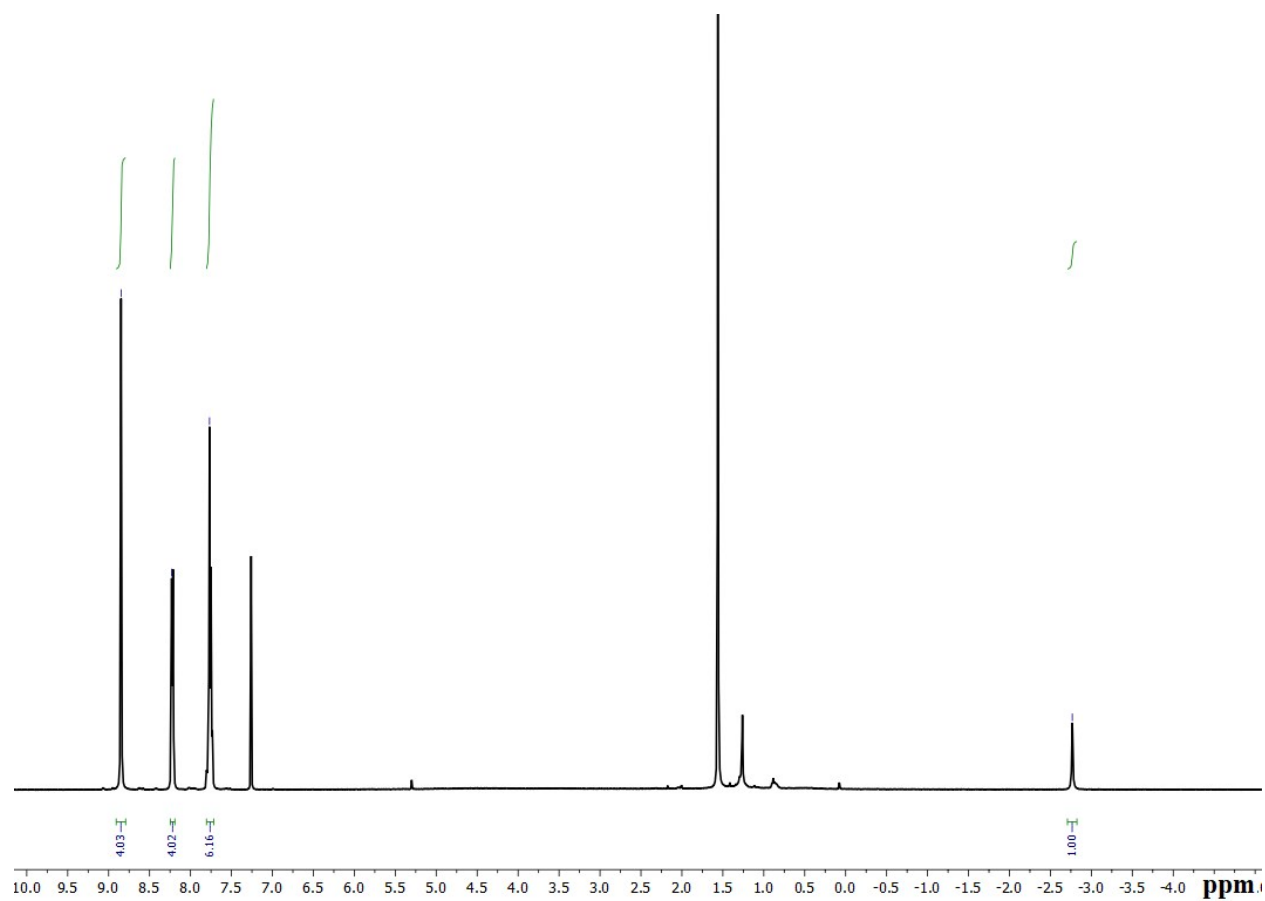

**Fig. S10**  $^1\text{H}$  NMR spectrum of 5,10,15,20-Tetraphenylporphin, **8** in  $\text{CDCl}_3$ .

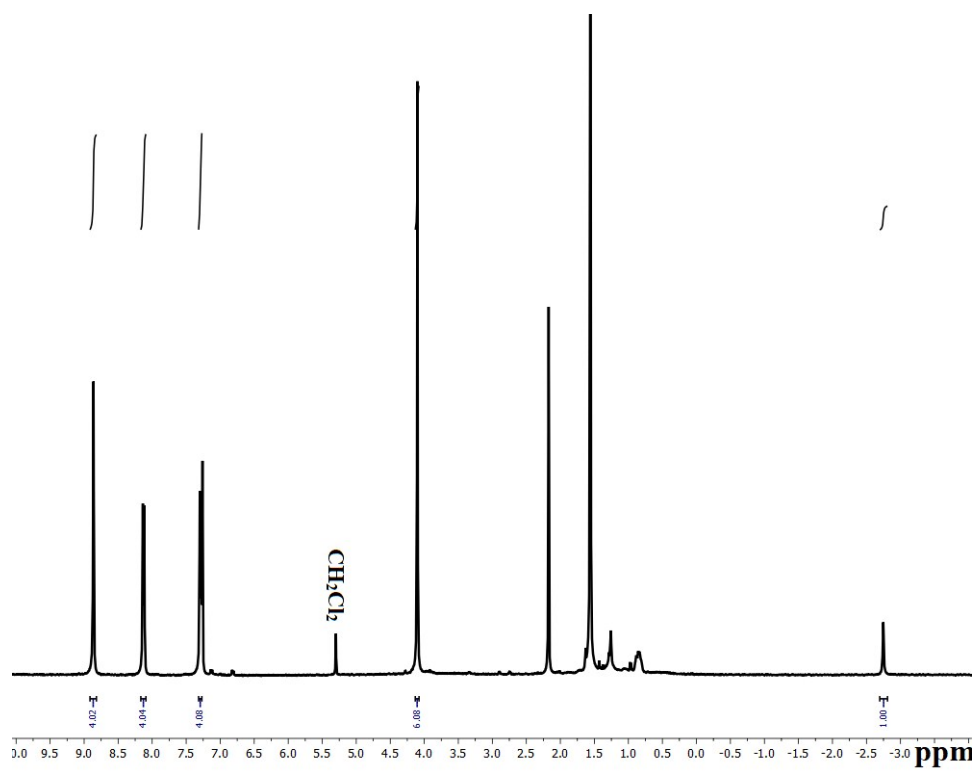

**Fig. S11**  $^1\text{H}$  NMR spectrum of 5,10,15,20-Tetrakis(4-methoxyphenyl)porphyrin, **9** in  $\text{CDCl}_3$ .

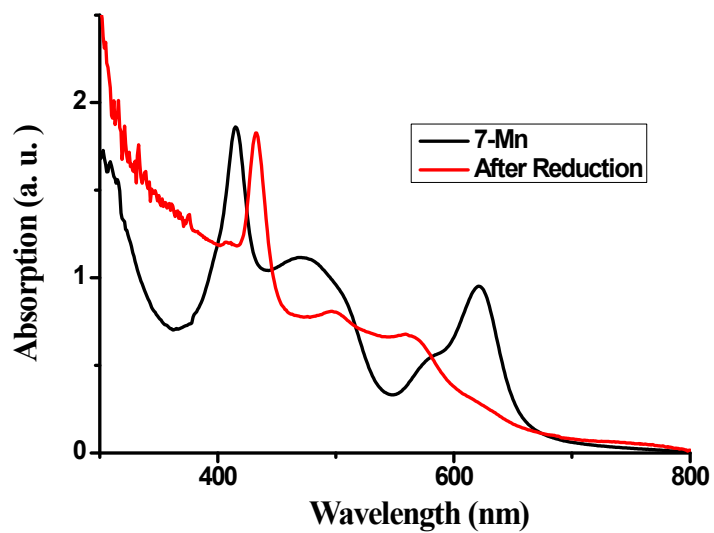

**Fig. S12** Chemical reduction of **7-Mn** via  $\text{LiAlH}_4$  in DCM solution at RT. Black line indicates the absorption spectra before reduction and red line indicates the species obtained after reduction.

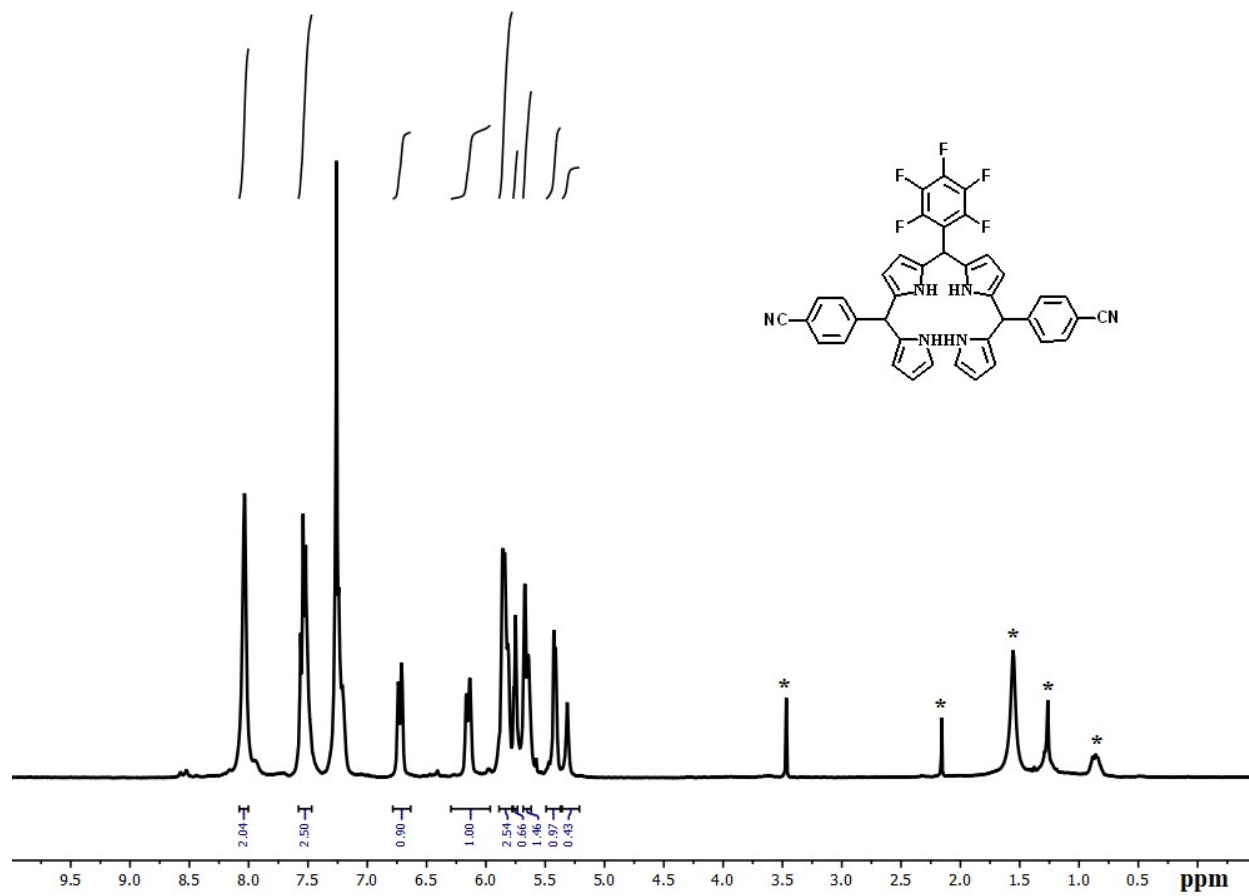

**Fig. S13**  $^1\text{H}$  NMR spectrum of 5,15-bis(4-cyanophenyl)-10-(pentafluorophenyl)tetrapyrane in  $\text{CDCl}_3$ .

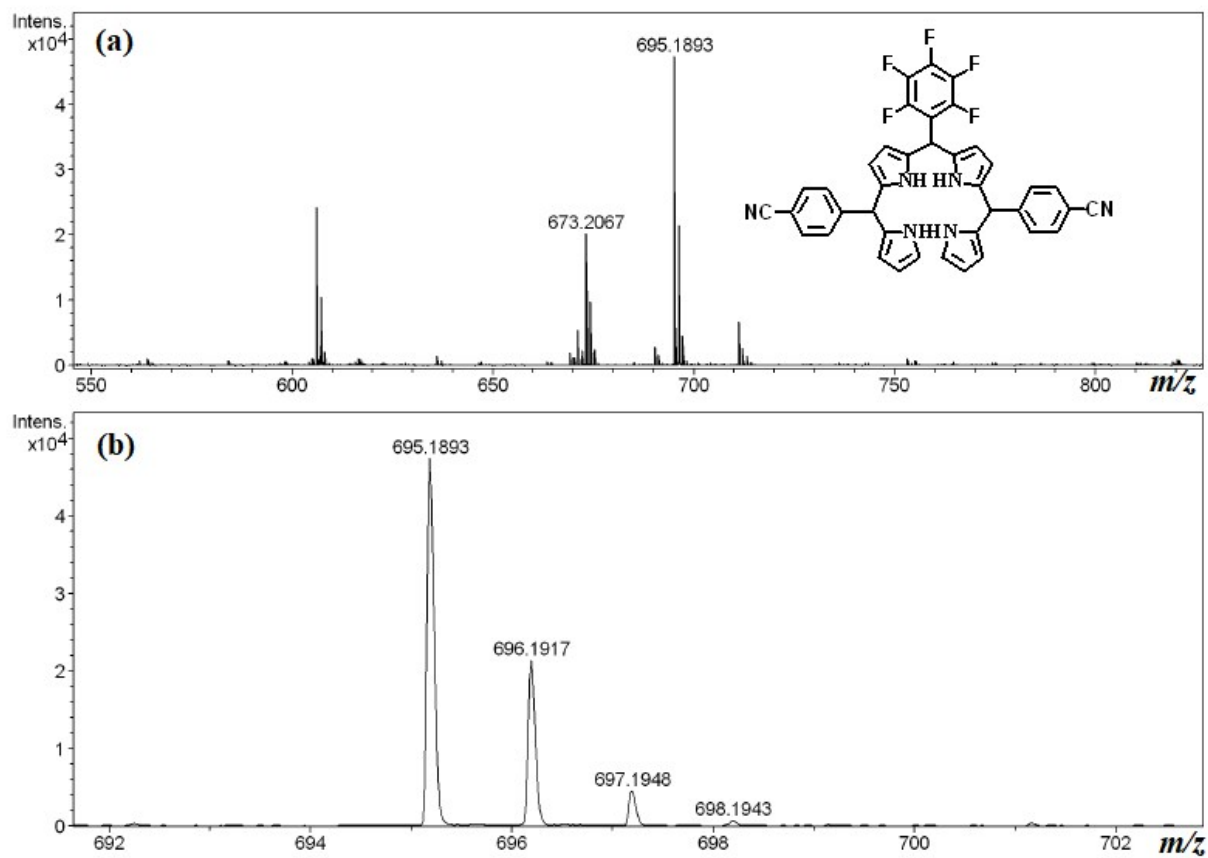

**Fig. S14** ESI- MS spectrum in  $\text{CH}_3\text{CN}$  shows the (a) measured spectrum, (b) isotopic distribution pattern of 5,15-bis(4-cyanophenyl)-10-(pentafluorophenyl)tetrapyrane.
